# Supplementary material for: A H3K27M-targeted vaccine in adults with diffuse midline glioma
Source: PubMed Central journal article supplement (PMC10579055; doi:10.1038/s41591-023-02555-6), 2023-09-21
Supplement: 41591_2023_2555_MOESM1_ESM.pdf [file 41591_2023_2555_MOESM1_ESM.pdf]

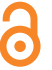

---

# A H3K27M-targeted vaccine in adults with diffuse midline glioma

---

In the format provided by the authors and unedited

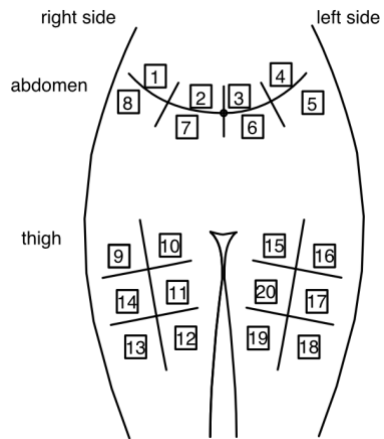

**Supplementary Figure 1: Administration of H3K27M-vac**

H3K27M-vac was injected subcutaneously in the lower abdomen or thigh followed by topical application of Imiquimod (5%, Aldara®) that was sealed by 5 x 5 cm of opsite flexifix.

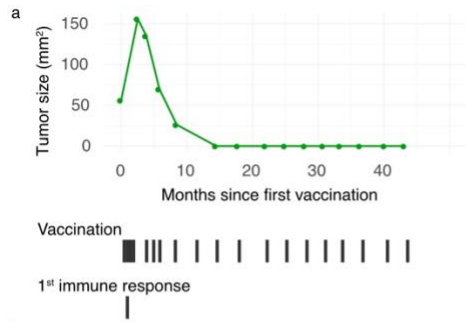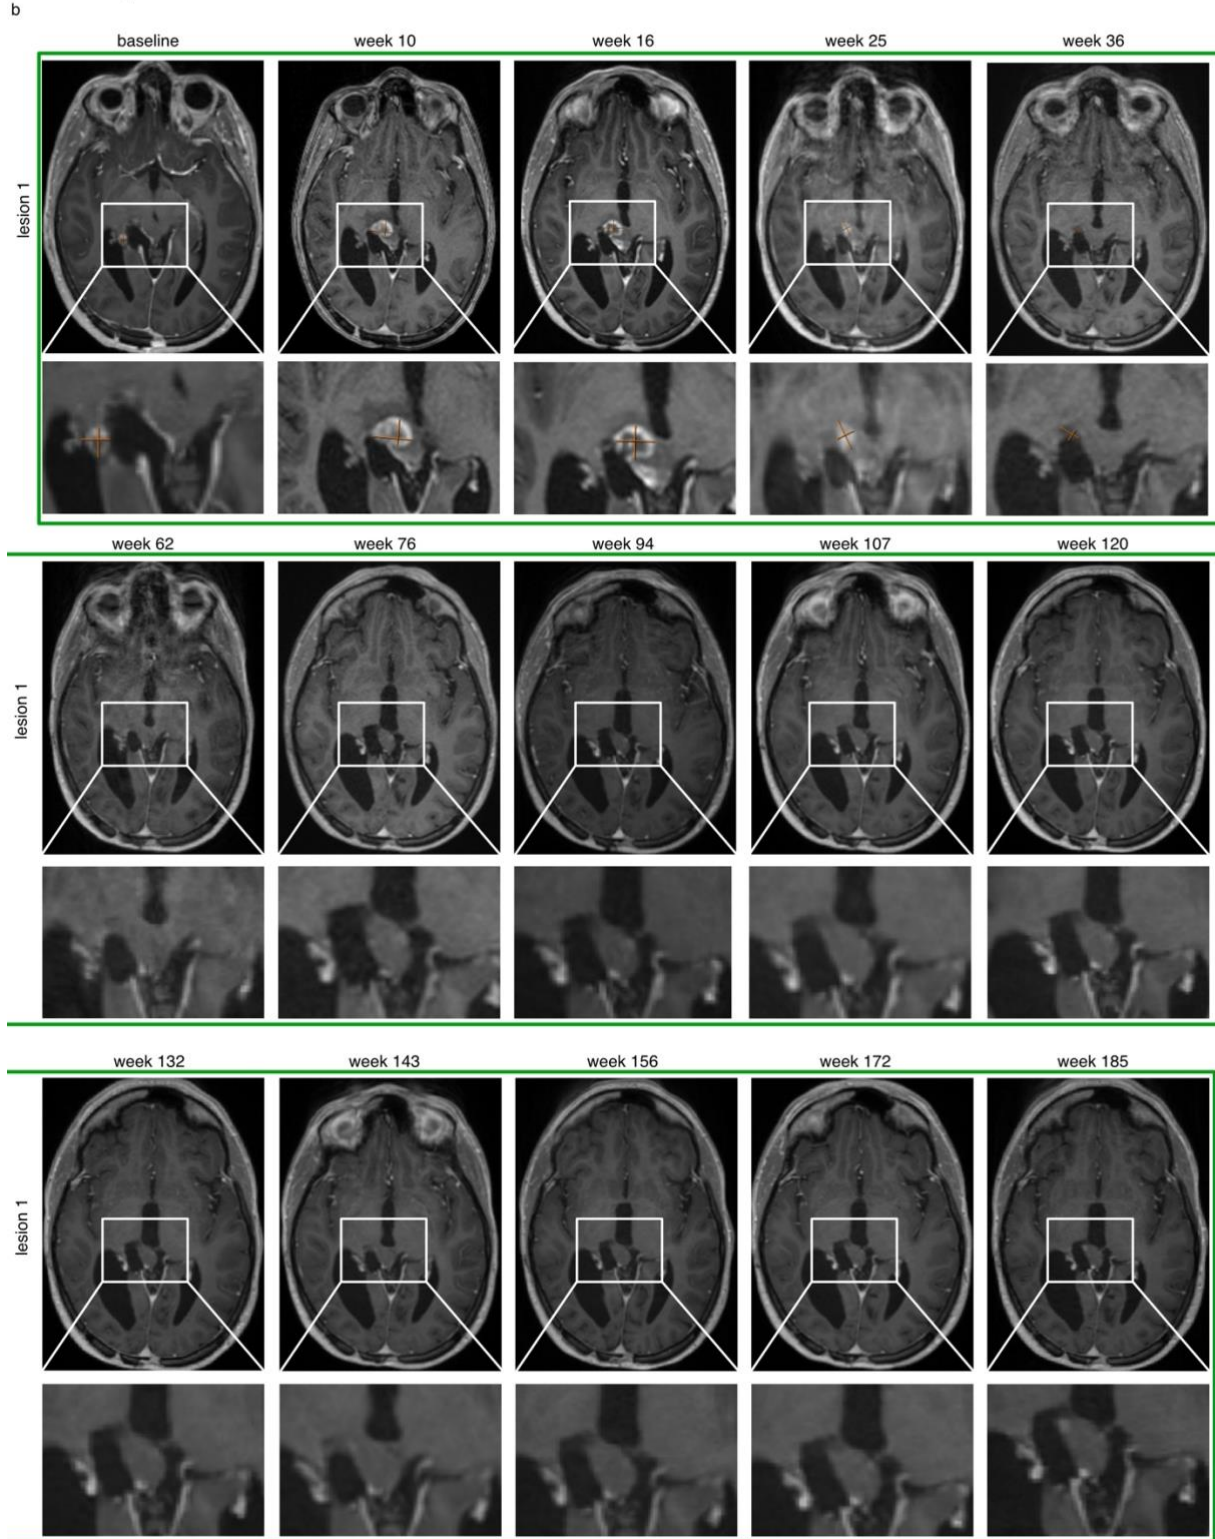

Supplementary Figure 2: Longitudinal course of T1 weighted contrast enhanced MRI images of patient ID 1

**a**, Tumor size in  $\text{mm}^2$  (top), therapy in the observation period and first immune response (bottom) as a function of time in months from start of vaccination. Size determined by product of maximal orthogonal diameters on T1 weighted contrast enhanced MRI imaging. **b**, Corresponding axial MRI sequences with maximal orthogonal diameters of contrast enhancing lesion and corresponding measurements indicated in orange, if applicable. Green box indicates MRIs while ID 1 was on treatment with H3K27M-vac.

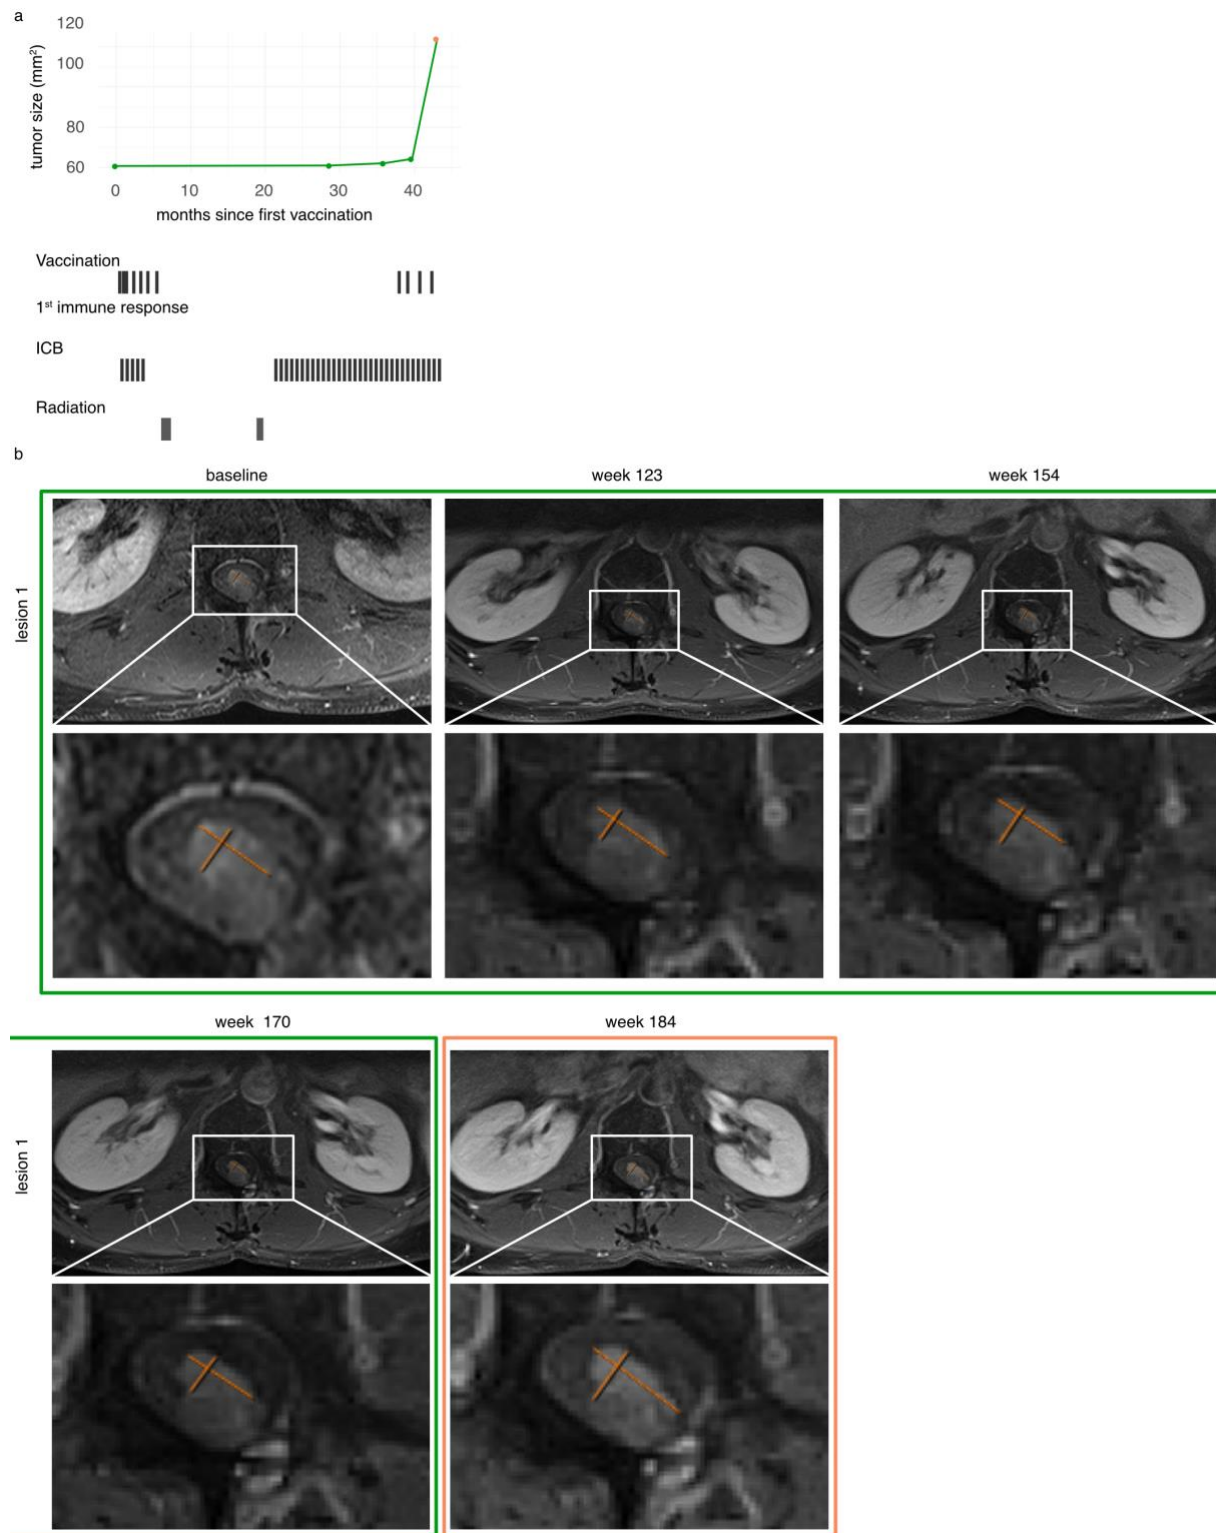

**Supplementary Figure 3: Longitudinal course of T1 weighted contrast enhanced MRI images of patient ID 2**

**a**, Tumor size in  $\text{mm}^2$  (top), concomitant therapy (bottom) consisting of two re-irradiations and anti-PD1 therapy as a function of time in months from start of vaccination. No immune response to H3K27M peptide was detected in this patient throughout the observation period. Size determined by product of maximal orthogonal diameters on T1 weighted contrast enhanced MRI imaging. **b**, Corresponding axial MRI sequences with maximal orthogonal diameters of contrast enhancing lesion and corresponding measurements indicated in orange. Green box indicates MRIs while ID 2 was on treatment with H3K27M-vac, orange box signifies MRI with progressive disease marking the end of the observation period and end of treatment period with H3K27M-vac.

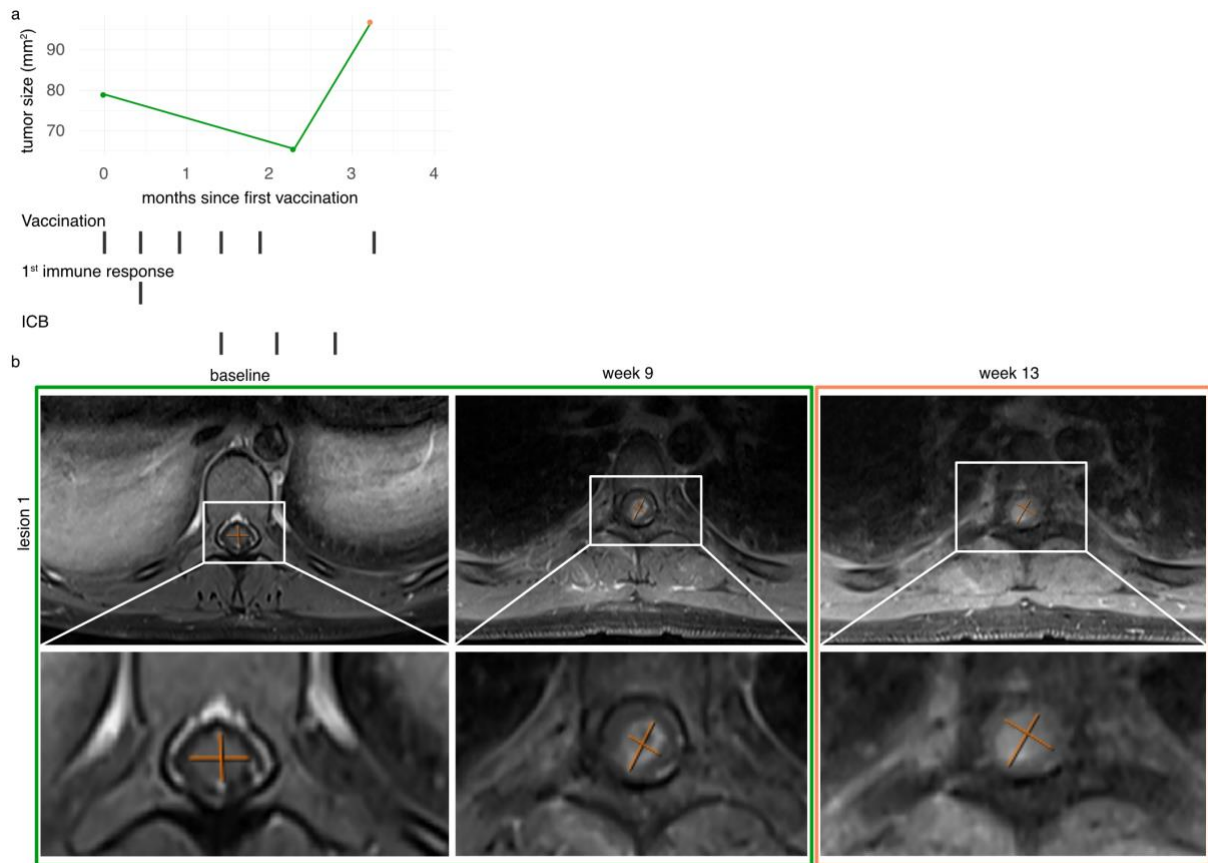

**Supplementary Figure 4: Longitudinal course of T1 weighted contrast enhanced MRI images of patient ID 3**

**a**, Tumor size in mm<sup>2</sup> (top) concomitant therapy (bottom) consisting of anti-PD1 treatment as a function of time in months from start of vaccination. Size determined by product of maximal orthogonal diameters on T1 weighted contrast enhanced MRI imaging. **b**, Corresponding axial MRI sequences with maximal orthogonal diameters of contrast enhancing lesion and corresponding measurements indicated in orange, if applicable. Green box indicates MRIs while ID 3 was on treatment with H3K27M-vac, orange box signifies MRI with progressive disease marking the end of the observation period and end of treatment period with H3K27-vac.

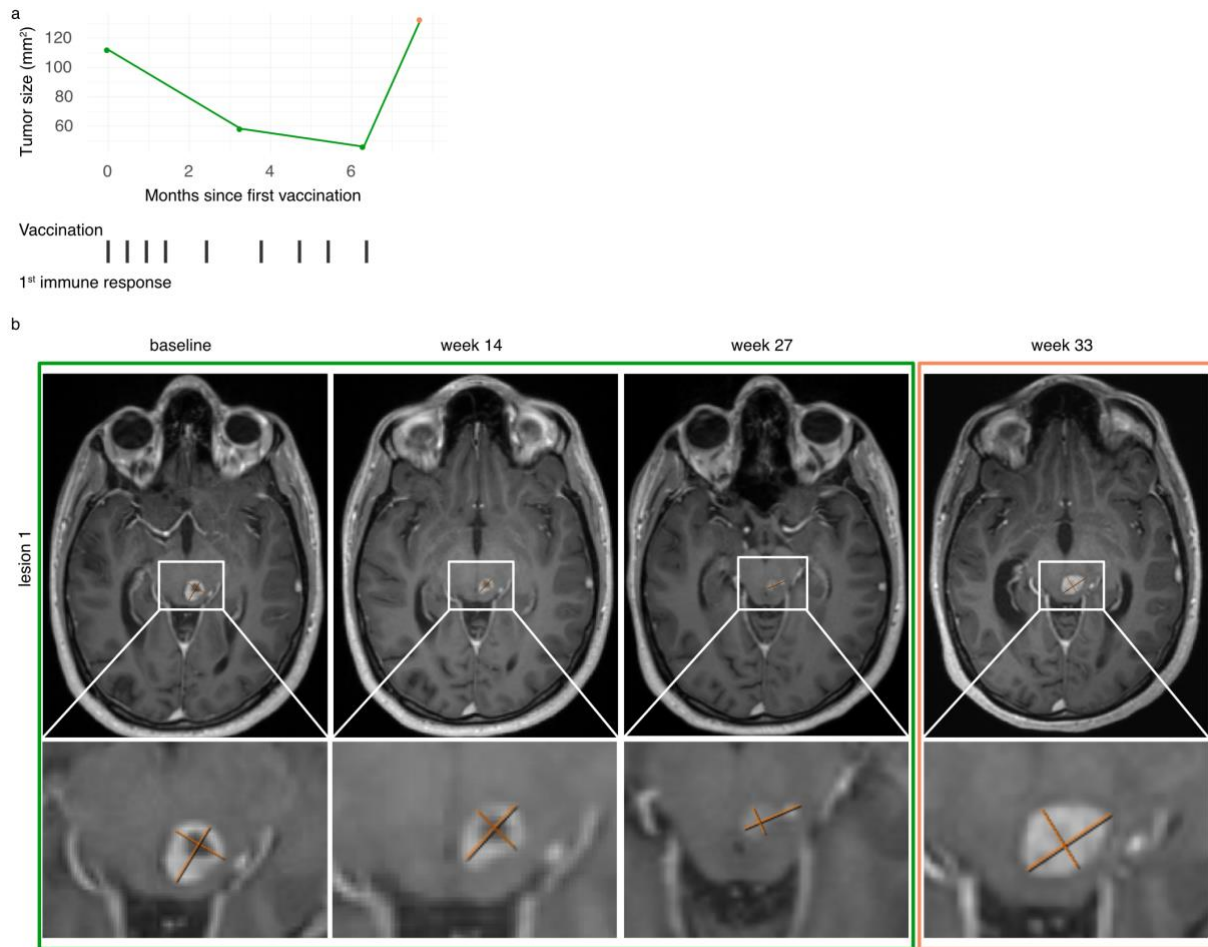

**Supplementary Figure 5: Longitudinal course of T1 weighted contrast enhanced MRI images of patient ID 4**

**a**, Tumor size in mm<sup>2</sup> (top) and therapy (bottom) in the observation period as a function of time in months from start of vaccination. No immune response to H3 K27M peptide was detected in this patient throughout the observation period. Size determined by product of maximal orthogonal diameters on T1 weighted contrast enhanced MRI imaging. **b**, Corresponding axial MRI sequences with maximal orthogonal diameters of contrast enhancing lesion and corresponding measurements indicated in orange. Green box indicates MRIs while ID 4 was on treatment with H3K27M-vac, orange box signifies MRI with progressive disease marking the end of the observation period and end of treatment period with H3K27-vac.

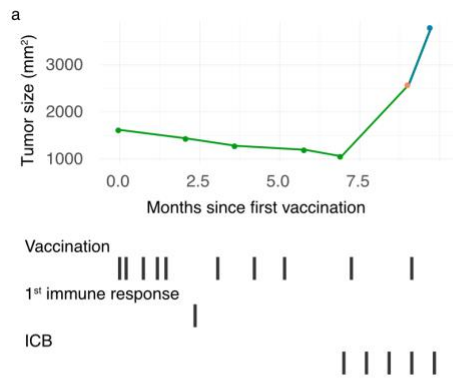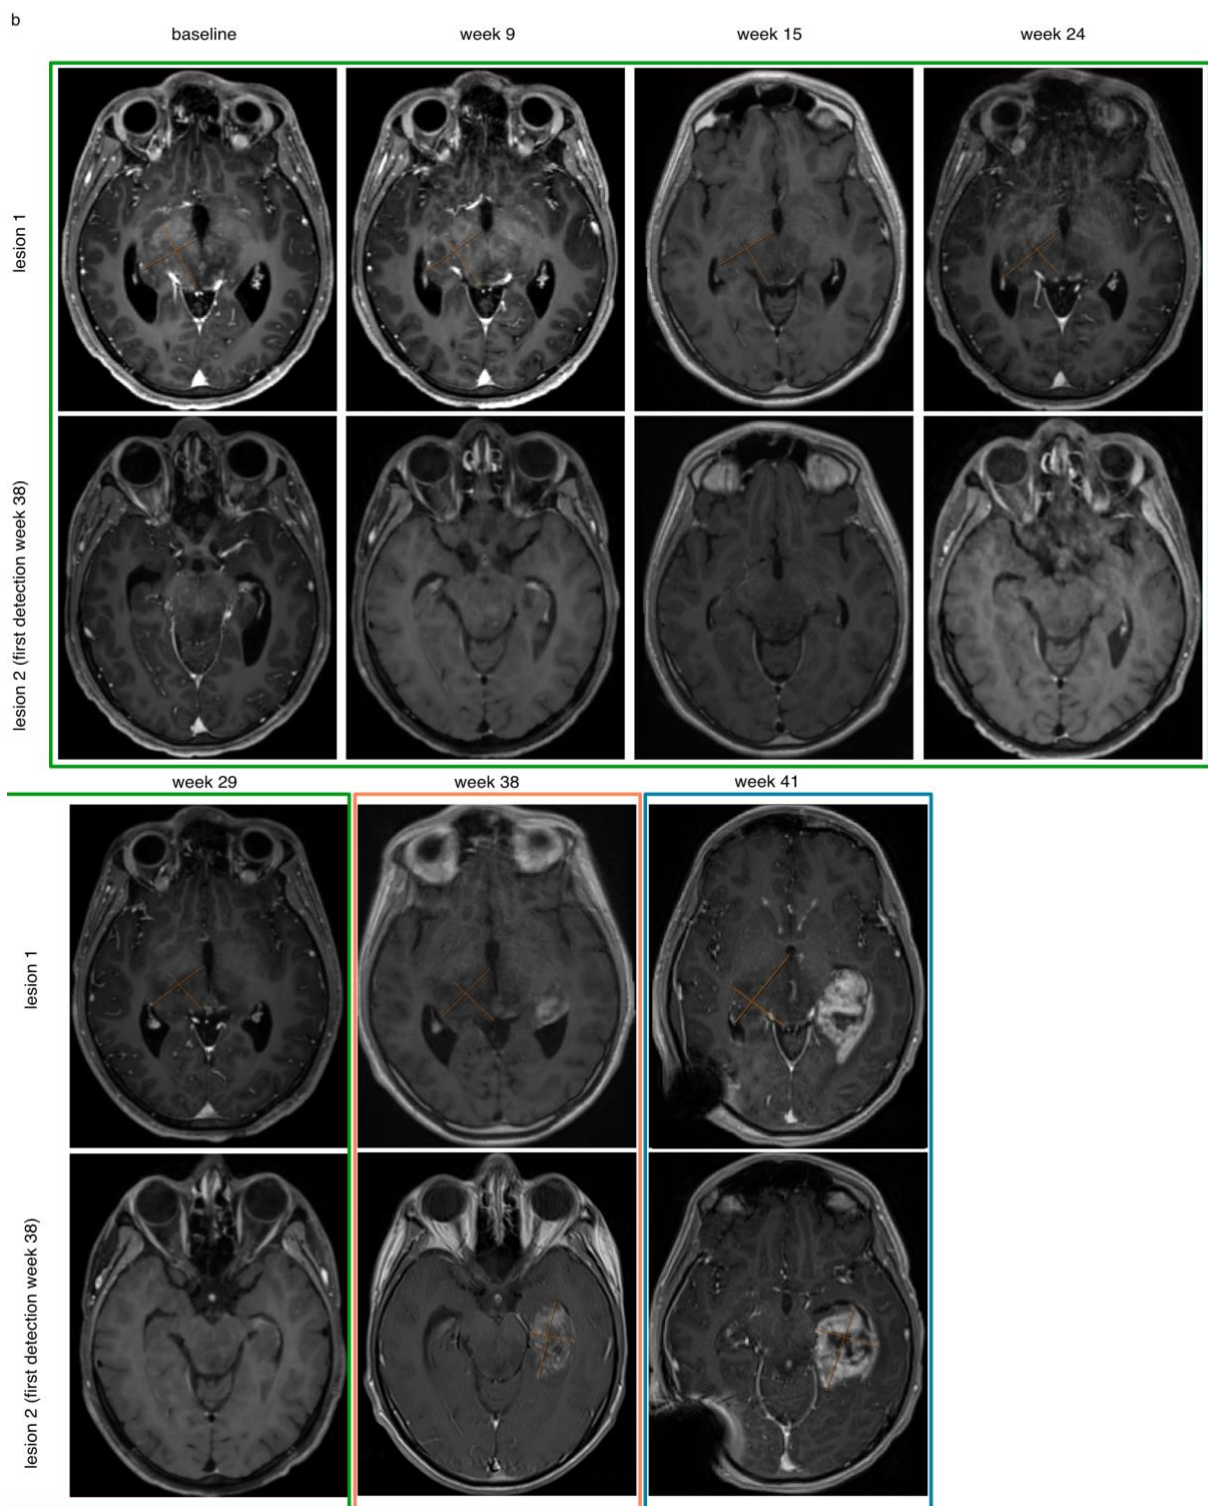

**Supplementary Figure 6: Longitudinal course of T1 weighted contrast enhanced MRI images of patient ID 5**

**a**, Tumor size in mm<sup>2</sup> (top) concomitant therapy (bottom) consisting of anti-PD1 treatment as a function of time in months from start of vaccination. Size determined by product of maximal orthogonal diameters on T1 weighted contrast enhanced MRI imaging. **b**, Corresponding axial MRI sequences with maximal orthogonal diameters of contrast enhancing lesion and corresponding measurements indicated in orange, if applicable. A second, new lesion with contrast enhancement was detected upon week 38. Green box indicates MRIs while ID 5 was on treatment with H3K27M-vac, orange box signifies MRI with progressive disease marking the end of treatment period with H3K27M-vac. The blue box marks an MRI that was obtained after the end of the treatment period.

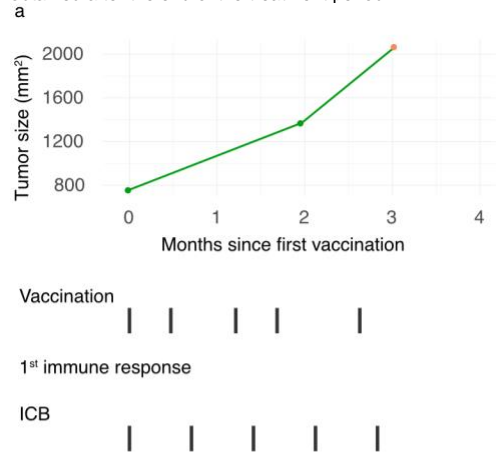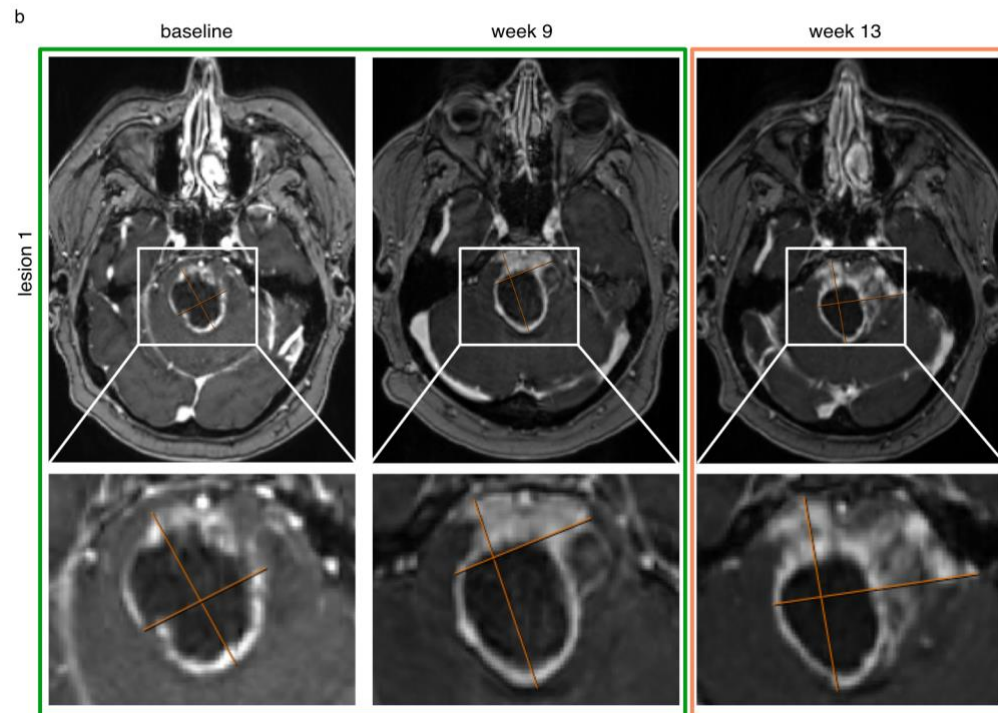

**Supplementary Figure 7: Longitudinal course of T1 weighted contrast enhanced MRI images of patient ID 6**

**a**, Tumor size in mm<sup>2</sup> (top) and concomitant therapy (bottom) consisting of anti-PD1 treatment as a function of time in months from start of vaccination. No immune response to H3 K27M peptide was detected in this patient throughout the observation period. Size determined by product of maximal orthogonal diameters on T1 weighted contrast enhanced MRI imaging. **b**, Corresponding axial MRI sequences with maximal orthogonal diameters of contrast enhancing lesion and corresponding measurements indicated in orange. Green box indicates MRIs while ID 6 was on treatment with H3K27M-vac, orange box signifies MRI with progressive disease marking the end of the observation period and end of treatment period with H3K27M-vac.



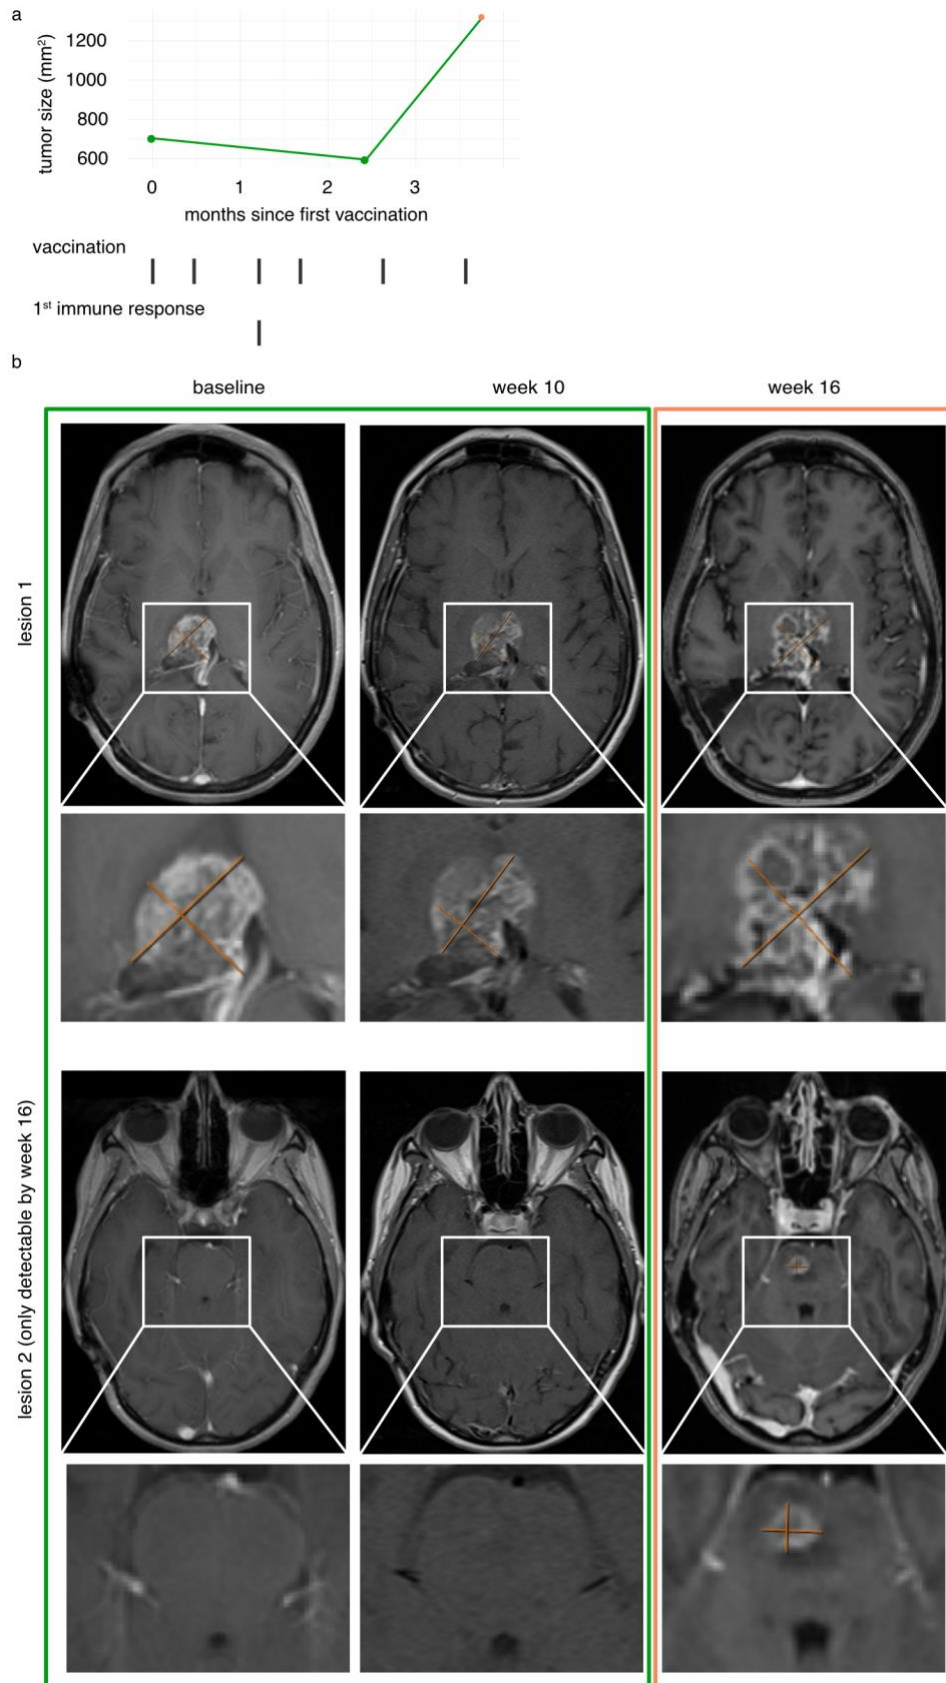

**Supplementary Figure 8: Longitudinal course of T1 weighted contrast enhanced MRI images of patient ID 7**

**a**, Tumor size in mm<sup>2</sup> (top) concomitant therapy (bottom) consisting of anti-PD1 treatment as a function of time in months from start of vaccination. Size determined by product of maximal orthogonal diameters on T1 weighted contrast enhanced MRI imaging. **b**, Corresponding axial MRI sequences with maximal orthogonal diameters of contrast enhancing lesion and corresponding measurements indicated in orange, if applicable. A second, new lesion with contrast enhancement was detected by week 16 for the first time. Green box indicates MRIs while ID 7 was on treatment with H3K27M-vac, orange box signifies MRI with progressive disease marking the end of the observation period and end of treatment period with H3K27M-vac.

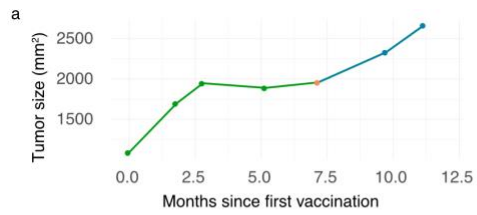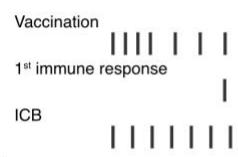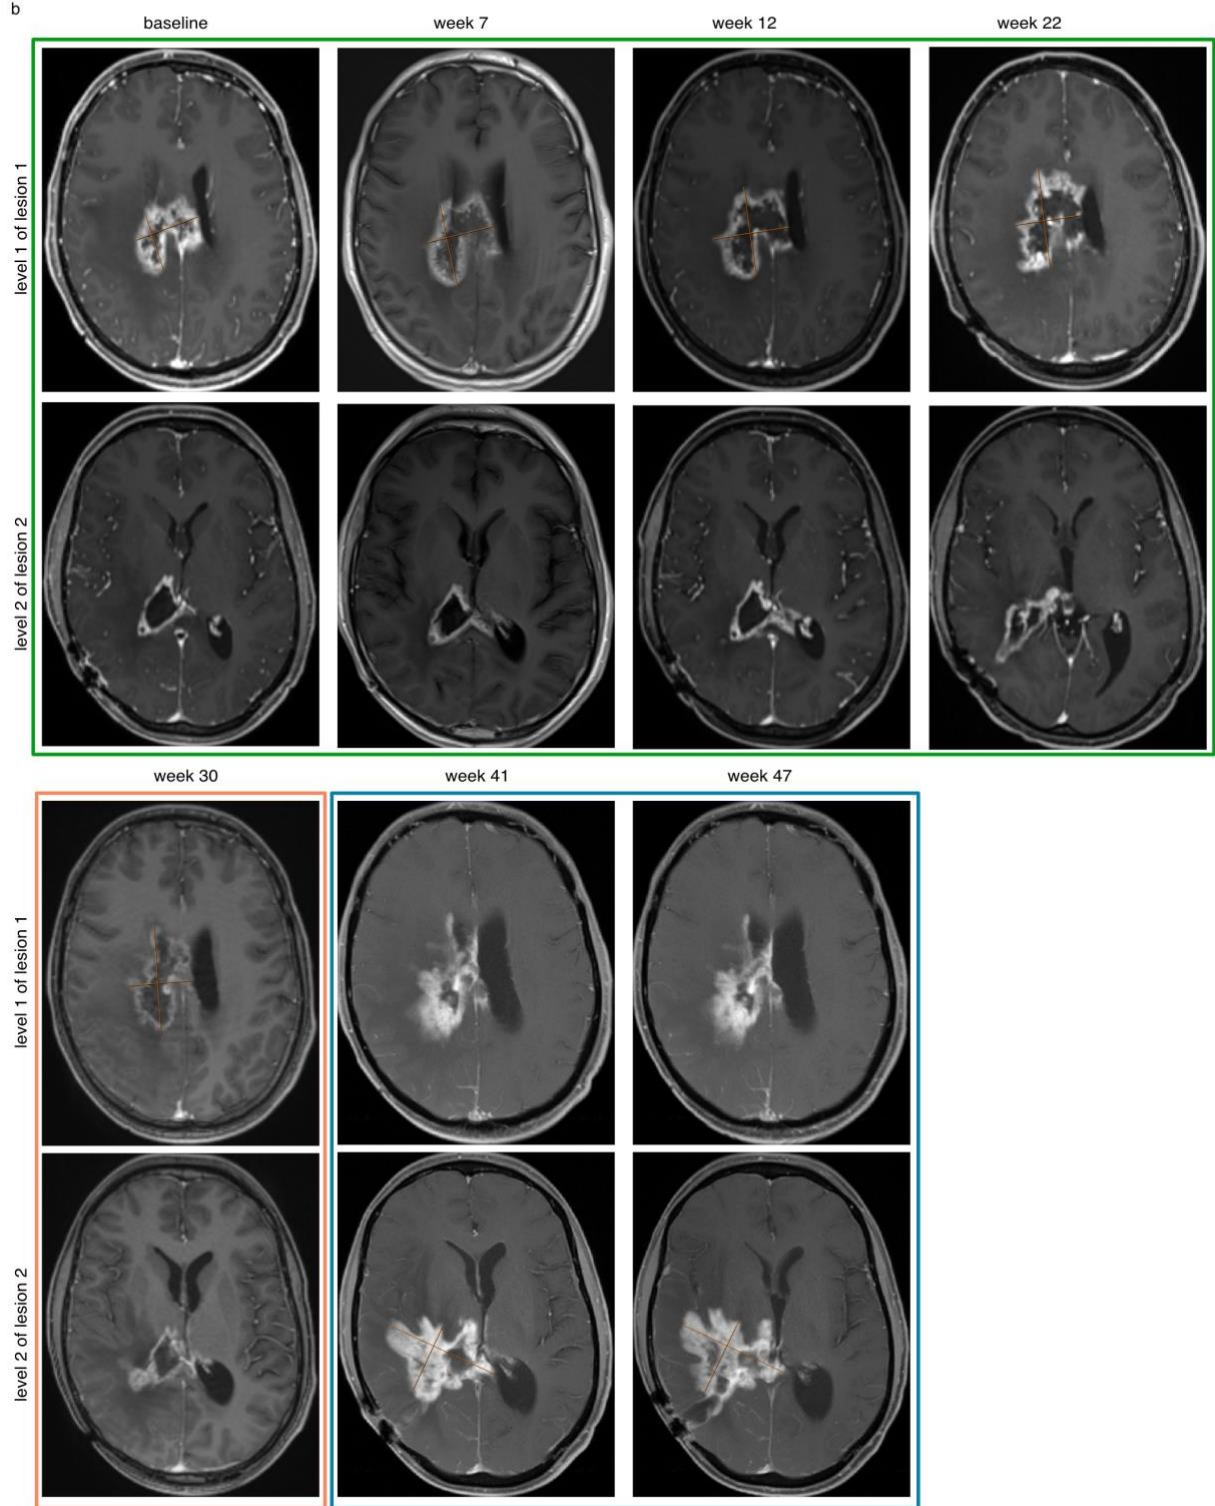

Supplementary Figure 9: Longitudinal course of T1 weighted contrast enhanced MRI images of patient ID 8

**a**, Tumor size in mm<sup>2</sup> (top) concomitant therapy (bottom) consisting of anti-PD1 treatment as a function of time in months from start of vaccination. Size determined by product of maximal orthogonal diameters on T1 weighted contrast enhanced MRI imaging. **b**, Corresponding axial MRI sequences with maximal orthogonal diameters of contrast enhancing lesion and corresponding measurements indicated in orange. While initially the maximal tumor diameter on axial MRI sequences was on level 1, by week 30 the same lesion grew on level 2 and had the maximal axial tumor diameter by week 41. Green box indicates MRIs while ID 8 was on treatment with H3K27M-vac, orange box signifies MRI with progressive disease marking the end of the treatment period with H3K277-vac. The blue box marks an MRIs that were obtained after the end of the treatment period.

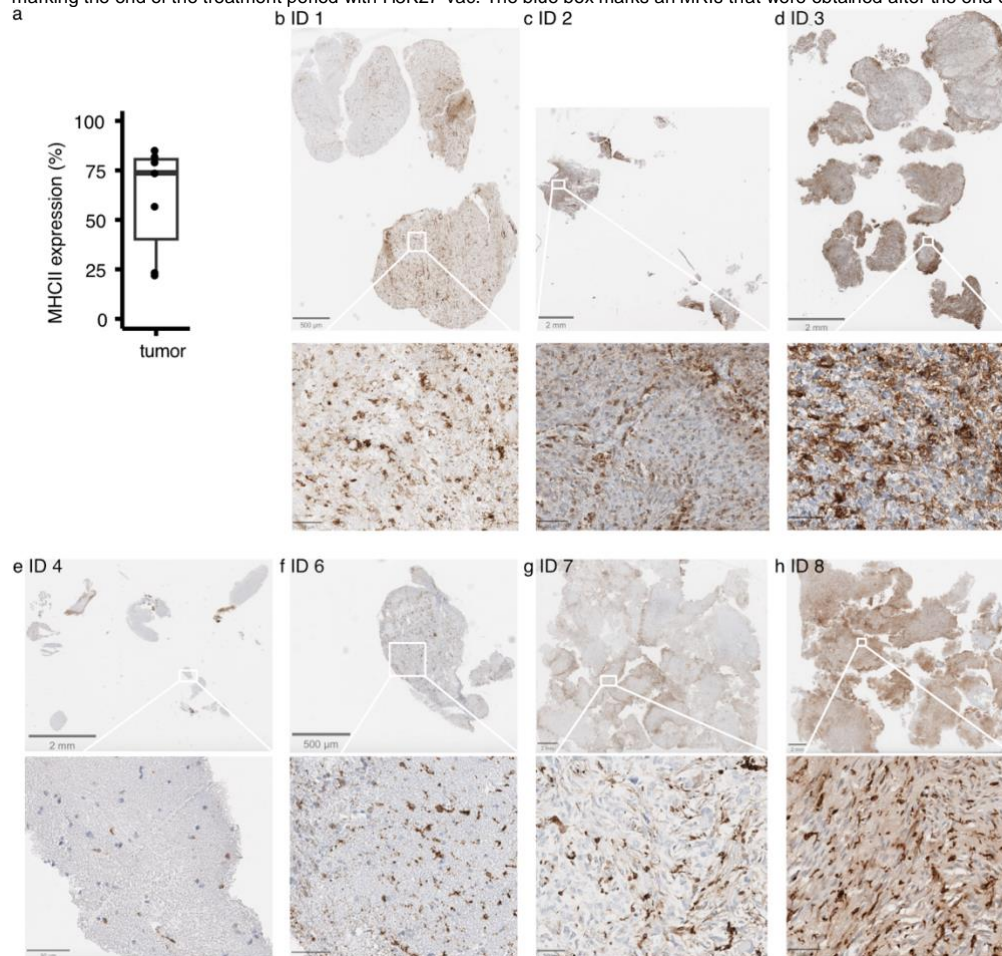

**Supplementary Figure 10: HLA-DR immunohistochemistry of primary tumor tissue**

**a**, Distribution of HLA-DR expression across all 7 patients with sufficient FFPE tissue (n=7 biologically independent patient samples). Box displays median and interquartile range (IQR), whiskers extend to the largest/smallest value no further than 1.5x IQR from the hinge. **b-h**: Immunohistochemistry (IHC) of HLA-DR expression across respective patients showing entire slide (top) and magnification (bottom). IHC was done once for every patient. Scale bars in top images in b and f = 500μm, in c-e and g,h = 10 μm, scale bar in magnifications (bottom) = 50μm.

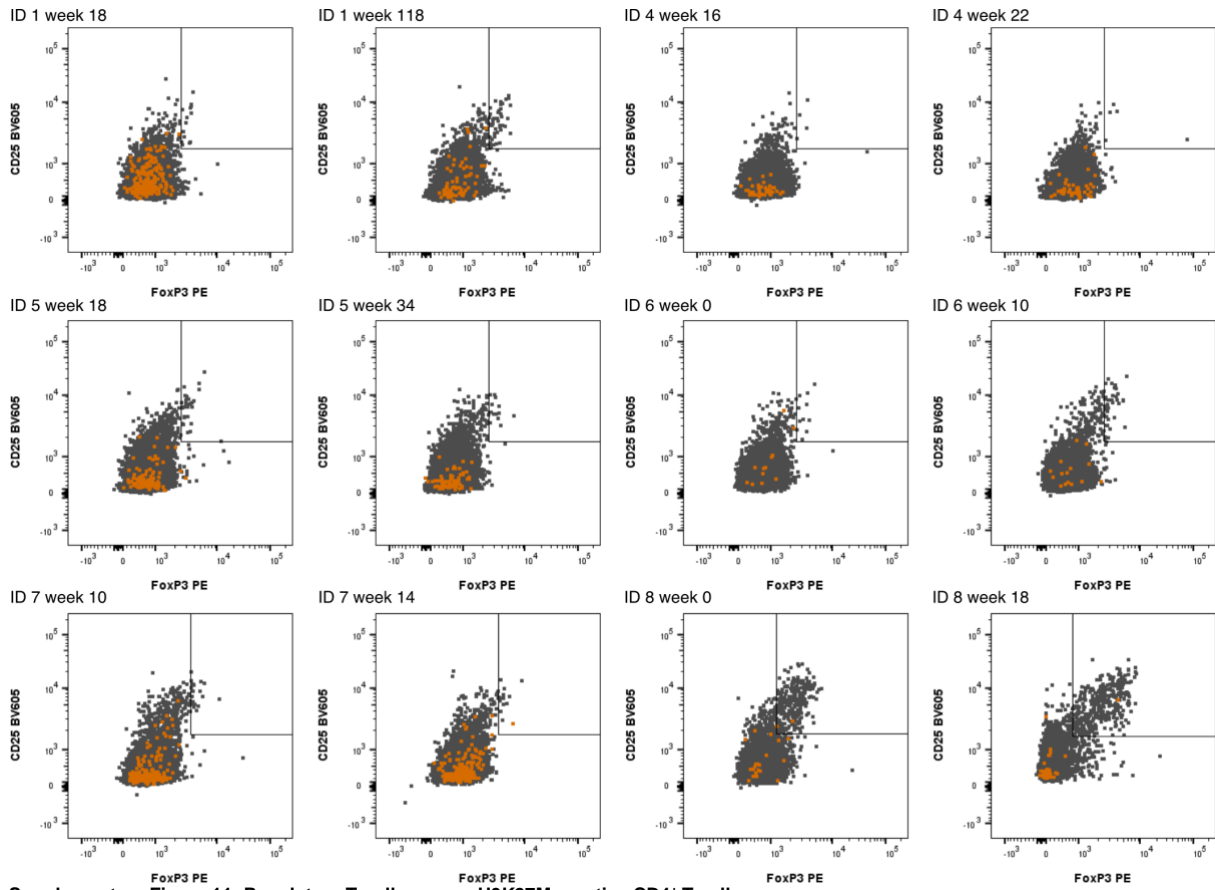

**Supplementary Figure 11: Regulatory T-cells among H3K27M-reactive CD4<sup>+</sup> T cells**

Tumor Necrosis Factor- $\alpha$  (TNF $\alpha$ ) expressing CD4<sup>+</sup> T cells in orange among H3K27M-peptide expanded PBMC re-stimulated with H3-mut, gated on CD25 and FoxP3, demonstrating, that CD25<sup>+</sup> FoxP3<sup>+</sup> cells are not among the TNF $\alpha$  expressing CD4<sup>+</sup> T cells. Patients and timepoints are indicated on the top left of each panel.

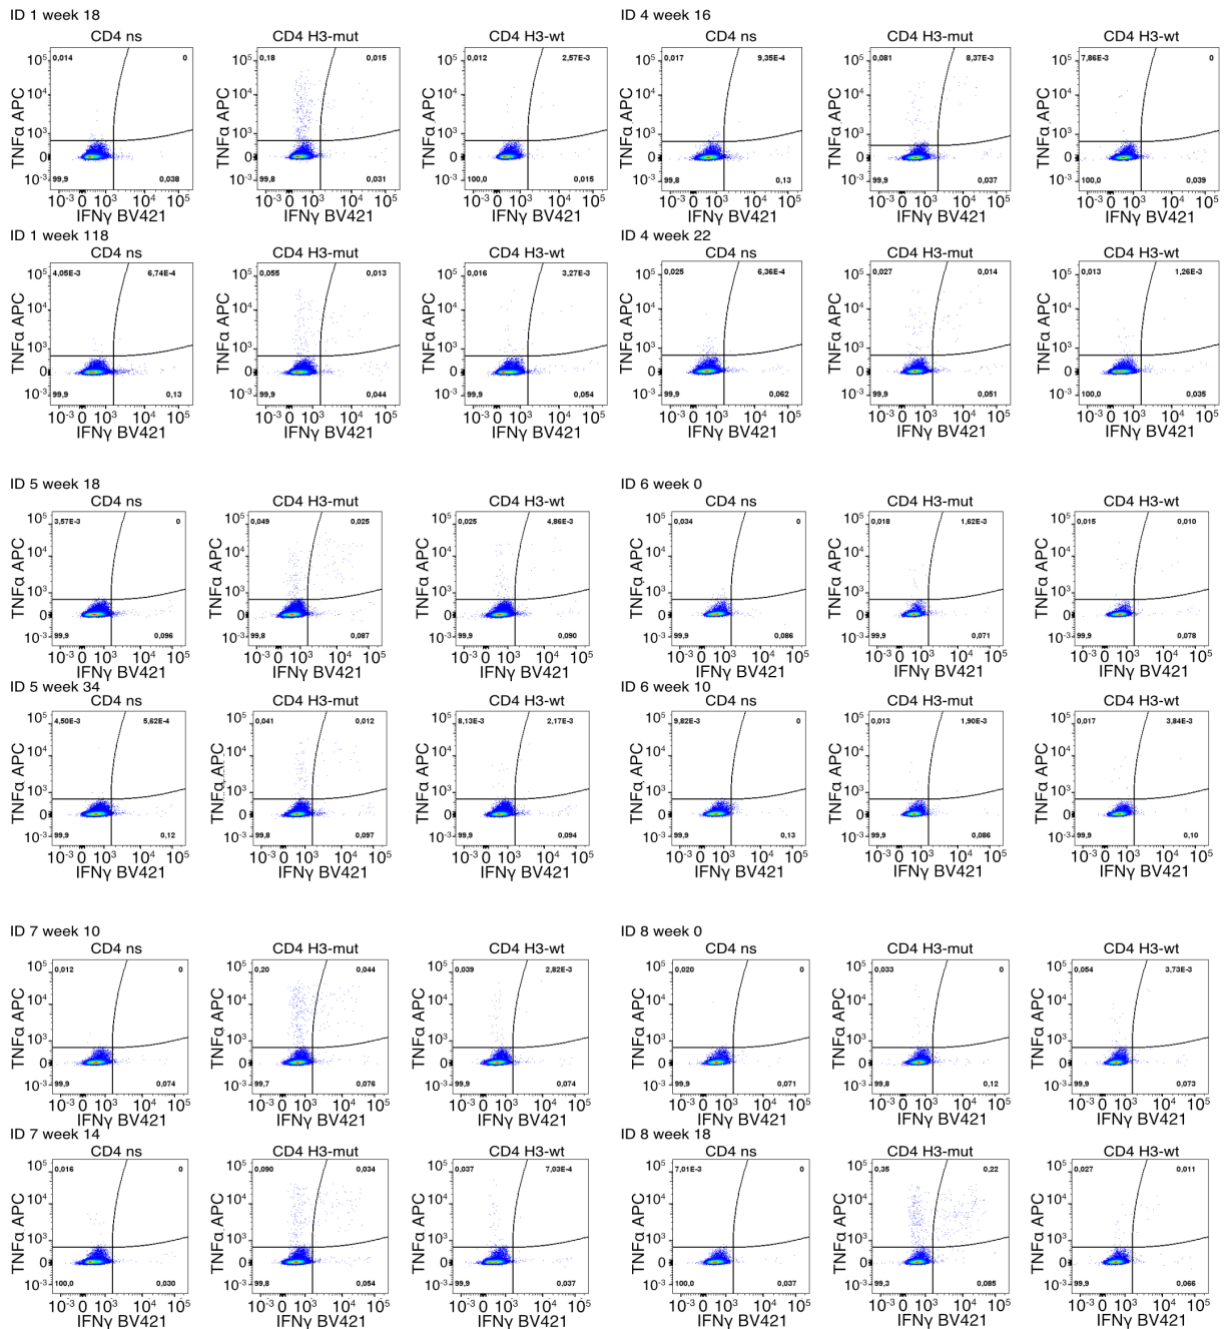

**Supplementary Figure 12: FACS raw data for Figure 5f of PBMCs analyzed by ex vivo ICS.** Flow cytometry-based intracellular IFN $\gamma$  and Tumor Necrosis Factor- $\alpha$  (TNF $\alpha$ ) detection in H3K27M-peptide expanded PBMC after short-term (5h) re-stimulation with H3-wt or H3-mut or non-stimulated (ns), gated on living CD3<sup>+</sup> CD4<sup>+</sup> T cells.

ID 1 week 18

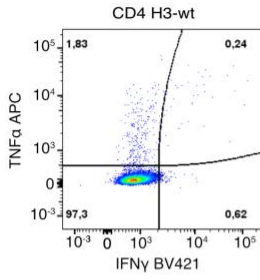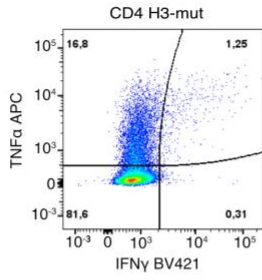

ID 1 week 118

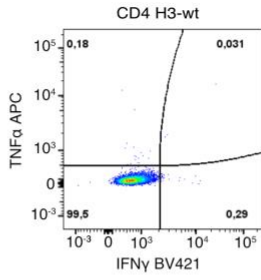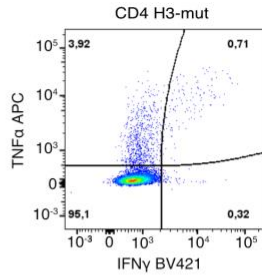

ID 4 week 16

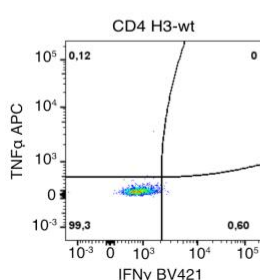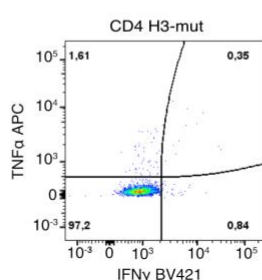

ID 4 week 22

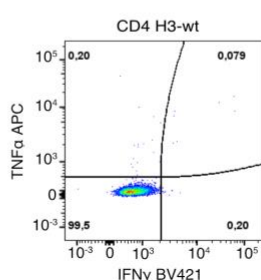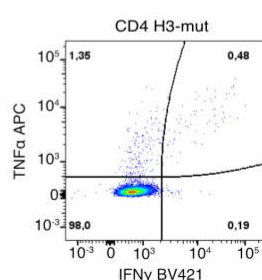

ID 5 week 18

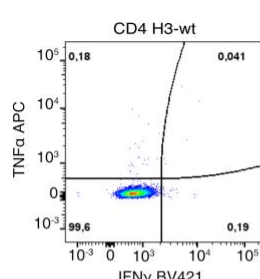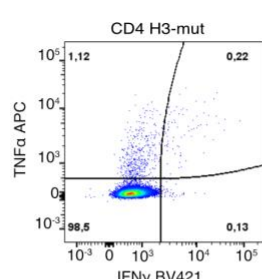

ID 5 week 34

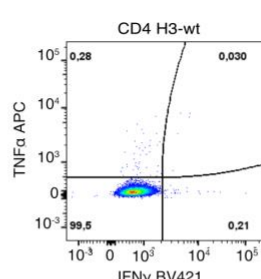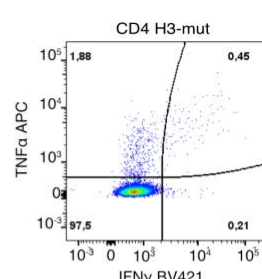

ID 6 week 0

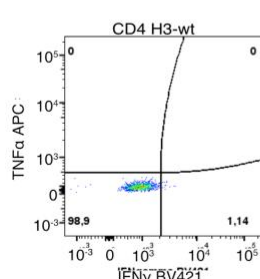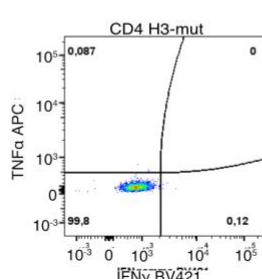

ID 6 week 10

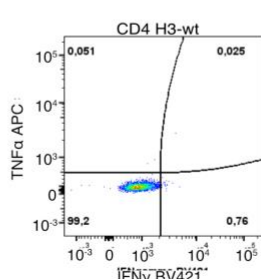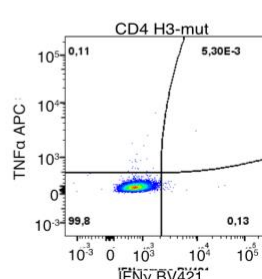

ID 7 week 10

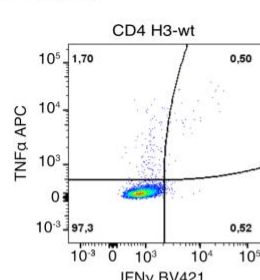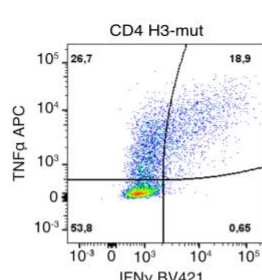

ID 7 week 14

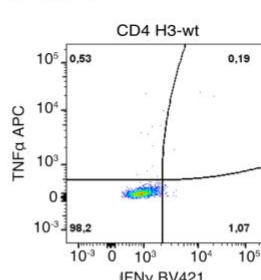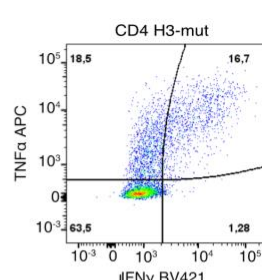

ID 8 week 0

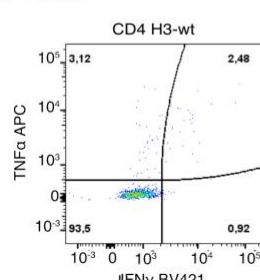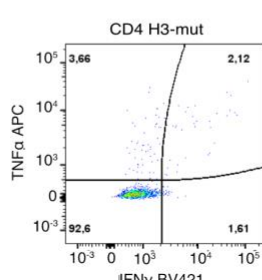

ID 8 week 18

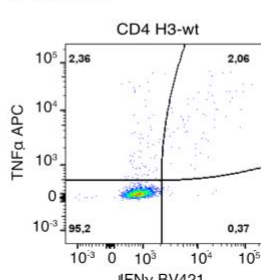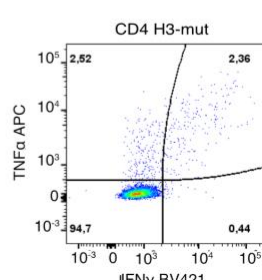

**Supplementary Figure 13: FACS raw data for Figure 5f of ex vivo peptide expanded PBMCs**

Flow cytometry-based intracellular IFN $\gamma$  and Tumor Necrosis Factor- $\alpha$  (TNF $\alpha$ ) detection in PBMC with H3K27M-peptide expansion for two weeks, re-stimulated with H3-wt or H3-mut, gated on living CD3 $^+$  CD4 $^+$  T cell subsets.

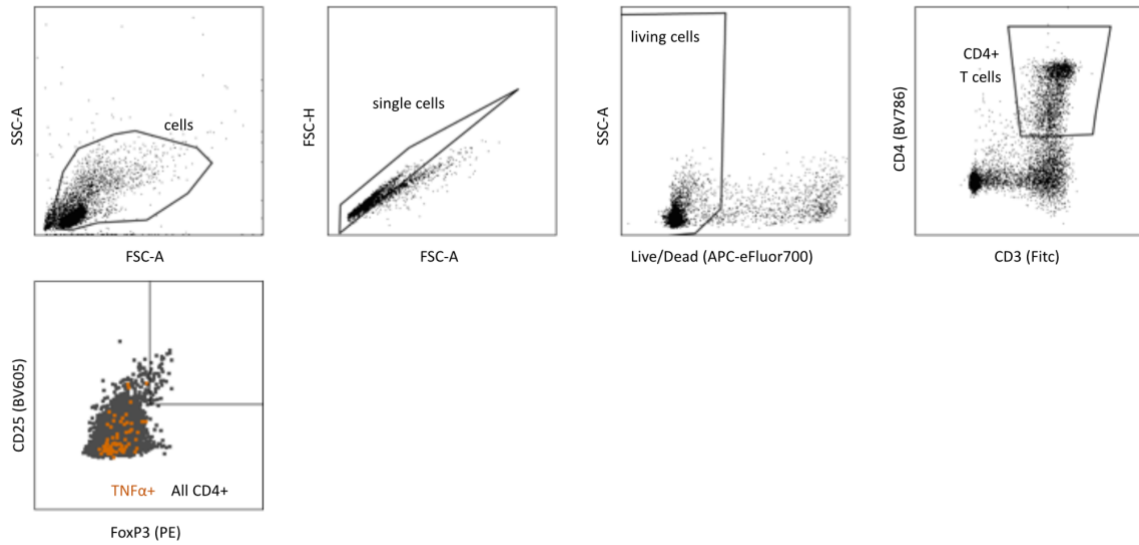

**Supplementary Figure 14: Hierarchical gating as gating strategy**

Exclusions of Debris (FSC-A vs SSC-A)/Exclusion of doublets (FSC-H vs FSC-A), Exclusion of dead-cells (SSC-A vs dead-cell-stain)/Definition of CD4 $^+$  T cells (BV786 vs CD3-Fitc+).
